# Supplementary material
Source: Springer Nature journal article supplement (https://www.springermedizin.de/resource/supplementary/12906_2014_2071_MOESM2_ESM.pdf/9523600)
Supplement: MOESM2 [file 9523600]

## Additional file 2

**Supplemental Table 1. List of primers used for q-RT-PCR**

| Gene Symbol   | Sequence (5' to 3')                       |
|---------------|-------------------------------------------|
| CD4 (mouse)   | Sense CCC AAG CCT TCC ATA GAA ATC AA      |
|               | Anti-sense CCA AGT ATA GTC AAC ATG CTG GT |
| CD8 (mouse)   | Sense CCG TTG ACC CGC TTT CTG T           |
|               | Anti-sense CGG CGT CCA TTT TCT TTG GAA    |
| CD11b (mouse) | Sense ATG GAC GCT GAT GGC AAT ACC         |
|               | Anti-sense TCC CCA TTC ACG TCT CCCA       |
| CD11c (mouse) | Sense CTG GGC CTG TCC CTT GCT             |
|               | Anti-sense ACA GTA GGA CCA CAA GCC AAC A  |
| NK1.1 (mouse) | Sense TGG GAG GAA GGT CTA GTT GAT TG      |
|               | Anti-sense TCT CCT GAG ATA GCA GCA CAG    |
| GAPDH (mouse) | Sense TGT GAT GGG TGT GAA CCA CGA G       |
|               | Anti-sense TGC TGT TGA AGT CGC AGG AGA C  |
